# Supplementary material for: A different vision of translational research in biomarker discovery: a pilot study on circulatory mitochondrial proteins as Parkinson’s disease potential biomarkers
Source: Springer Nature journal article supplement (doi:10.1186/s40035-020-00188-0), 2020-04-03
Supplement: MOESM3 [file 17864628]

**Supplementary Table 1 – Data of patients and control individuals included in the discovery study.** Individual sample codes (in italic) and demographic parameters are indicated for all the samples. Clinical parameters are indicated in the disease group. For each group it is indicated an overall characterization of the group with the indication of the mean values, intervals, and gender distribution (indicated in bold).

|             | <b>Age at blood coll. (y)<sup>a</sup></b> | <b>Gender<sup>b</sup></b> | <b>Disease Duration (y)</b> | <b>Age at Onset (y)</b> | <b>Family history<sup>c</sup></b> | <b>HY scale<sup>d</sup></b> | <b>Total L-Dopa (converted CR + IR) (mg/day)<sup>e</sup></b> |
|-------------|-------------------------------------------|---------------------------|-----------------------------|-------------------------|-----------------------------------|-----------------------------|--------------------------------------------------------------|
| <i>PD10</i> | 63                                        | F                         | 15.0                        | 48                      | N                                 | 1.5                         | 400                                                          |
| <i>PD24</i> | 63                                        | F                         | 9.0                         | 54                      | Y                                 | 2                           | 475                                                          |
| <i>PD35</i> | 63                                        | F                         | 1.5                         | 62                      | N                                 | 2                           | 300                                                          |
| <i>PD11</i> | 64                                        | M                         | 2.0                         | 62                      | N                                 | 1                           | 300                                                          |
| <i>PD38</i> | 64                                        | M                         | 10.0                        | 54                      | N                                 | 2                           | 400                                                          |
| <i>PD32</i> | 67                                        | M                         | 10.0                        | 57                      | N                                 | 4                           | 300                                                          |
| <i>PD34</i> | 68                                        | M                         | 5.0                         | 63                      | N                                 | 1                           | 200                                                          |
| <i>PD39</i> | 69                                        | M                         | 1.5                         | 68                      | N                                 | 1                           | 300                                                          |
| <i>PD33</i> | 70                                        | M                         | 2.0                         | 68                      | N                                 | 1                           | 0                                                            |
| <i>PD23</i> | 71                                        | M                         | 10.0                        | 61                      | N                                 | 2                           | 300                                                          |
| <i>PD29</i> | 72                                        | F                         | 1.0                         | 71                      | N                                 | 1.5                         | 150                                                          |
| <i>PD30</i> | 72                                        | M                         | 6.0                         | 66                      | N                                 | 1                           | 400                                                          |
| <i>PD14</i> | 73                                        | F                         | 4.0                         | 69                      | N                                 | 1                           | 300                                                          |
| <i>PD16</i> | 73                                        | M                         | 7.0                         | 66                      | N                                 | 1                           | 200                                                          |
| <i>PD15</i> | 74                                        | F                         | 7.0                         | 67                      | N                                 | 1                           | 300                                                          |
| <i>PD18</i> | 75                                        | M                         | 0.7                         | 74                      | N                                 | 1                           | 50                                                           |
| <i>PD8</i>  | 76                                        | F                         | 2.0                         | 74                      | N                                 | 3                           | 733                                                          |
| <i>PD17</i> | 76                                        | F                         | 8.0                         | 68                      | N                                 | 1                           | 850                                                          |
| <i>PD7</i>  | 77                                        | M                         | 10.0                        | 67                      | N                                 | 4                           | 1033                                                         |
| <i>PD28</i> | 77                                        | M                         | 8.0                         | 69                      | N                                 | 3                           | 200                                                          |
| <i>PD31</i> | 77                                        | M                         | 6.0                         | 71                      | N                                 | 2                           | 150                                                          |
| <i>PD36</i> | 77                                        | M                         | 2.0                         | 75                      | N                                 | 2.5                         | 1150                                                         |
| <i>PD6</i>  | 78                                        | M                         | 3.0                         | 75                      | N                                 | 1                           | 650                                                          |
| <i>PD19</i> | 79                                        | M                         | 4.0                         | 75                      | N                                 | 1                           | 650                                                          |
| <i>PD21</i> | 79                                        | M                         | 12.0                        | 67                      | N                                 | 1                           | 0                                                            |
| <i>PD26</i> | 80                                        | F                         | 7.0                         | 73                      | N                                 | 4                           | 300                                                          |
| <i>PD27</i> | 80                                        | F                         | 4.0                         | 76                      | N                                 | 3                           | 200                                                          |
| <i>PD12</i> | 81                                        | F                         | 11.0                        | 70                      | N                                 | 1.5                         | 725                                                          |

**Parkinson's Disease Group**

|               |                       |                           |                                        |                              |                              |                      |                         |                                  |
|---------------|-----------------------|---------------------------|----------------------------------------|------------------------------|------------------------------|----------------------|-------------------------|----------------------------------|
|               | PD22                  | 84                        | F                                      | 9.0                          | 75                           | N                    | 1                       | 400                              |
|               | PD25                  | 85                        | F                                      | 10.0                         | 75                           | N                    | 3                       | 200                              |
|               | PD20                  | 86                        | F                                      | 6.0                          | 80                           | N                    | 2                       | -                                |
|               | <b>Group overview</b> | <b>74±7<br/>[63, 83]</b>  | <b>M:17 (54.8%)<br/>F: 14 (45.2%)</b>  | <b>6.2±3.8<br/>[0.7, 15]</b> | <b>67.7±7.4<br/>[48, 80]</b> | <b>N: 30<br/>Y:1</b> | <b>1.8±1<br/>[1, 4]</b> | <b>374.7±288.7<br/>[0, 1150]</b> |
| Control Group | Ctrl29                | 55                        | M                                      | -                            | -                            | -                    | -                       | -                                |
|               | Ctrl34                | 56                        | F                                      | -                            | -                            | -                    | -                       | -                                |
|               | Ctrl12                | 57                        | M                                      | -                            | -                            | -                    | -                       | -                                |
|               | Ctrl13                | 57                        | F                                      | -                            | -                            | -                    | -                       | -                                |
|               | Ctrl14                | 57                        | M                                      | -                            | -                            | -                    | -                       | -                                |
|               | Ctrl16                | 57                        | M                                      | -                            | -                            | -                    | -                       | -                                |
|               | Ctrl17                | 57                        | M                                      | -                            | -                            | -                    | -                       | -                                |
|               | Ctrl31                | 57                        | F                                      | -                            | -                            | -                    | -                       | -                                |
|               | Ctrl32                | 57                        | M                                      | -                            | -                            | -                    | -                       | -                                |
|               | Ctrl10                | 60                        | M                                      | -                            | -                            | -                    | -                       | -                                |
|               | Ctrl27                | 60                        | F                                      | -                            | -                            | -                    | -                       | -                                |
|               | Ctrl18                | 61                        | M                                      | -                            | -                            | -                    | -                       | -                                |
|               | Ctrl24                | 62                        | F                                      | -                            | -                            | -                    | -                       | -                                |
|               | Ctrl38                | 62                        | F                                      | -                            | -                            | -                    | -                       | -                                |
|               | Ctrl15                | 64                        | M                                      | -                            | -                            | -                    | -                       | -                                |
|               | Ctrl6                 | 65                        | F                                      | -                            | -                            | -                    | -                       | -                                |
|               | Ctrl7                 | 70                        | M                                      | -                            | -                            | -                    | -                       | -                                |
|               | Ctrl39                | 73                        | F                                      | -                            | -                            | -                    | -                       | -                                |
|               | Ctrl26                | 74                        | F                                      | -                            | -                            | -                    | -                       | -                                |
|               | Ctrl37                | 75                        | F                                      | -                            | -                            | -                    | -                       | -                                |
|               | Ctrl28                | 77                        | M                                      | -                            | -                            | -                    | -                       | -                                |
|               | Ctrl30                | 77                        | M                                      | -                            | -                            | -                    | -                       | -                                |
|               | Ctrl35                | 78                        | M                                      | -                            | -                            | -                    | -                       | -                                |
|               | Ctrl23                | 79                        | M                                      | -                            | -                            | -                    | -                       | -                                |
|               | Ctrl11                | 81                        | M                                      | -                            | -                            | -                    | -                       | -                                |
|               | Ctrl20                | 81                        | F                                      | -                            | -                            | -                    | -                       | -                                |
| Ctrl36        | 81                    | F                         | -                                      | -                            | -                            | -                    | -                       |                                  |
| Ctrl8         | 83                    | M                         | -                                      | -                            | -                            | -                    | -                       |                                  |
|               | <b>Group overview</b> | <b>67±10<br/>[55, 83]</b> | <b>M: 16 (57.1%)<br/>F: 12 (42.9%)</b> | -                            | -                            | -                    | -                       | -                                |

<sup>a</sup>Age at blood coll. (y): age at blood collection in years; <sup>b</sup>The individuals were divided into males (M) and females (F); <sup>c</sup>Number of individuals with familiar history of PD (Y) and those without any familiar link to the disease (N); <sup>d</sup>Hoehn and Yahr scale; <sup>e</sup>Total L-Dopa (converted CR + IR)

(mg/day): calculated as the controlled release (CR) plus immediate release (IR) in milligrams per day.
