# Supplementary material for: A different vision of translational research in biomarker discovery: a pilot study on circulatory mitochondrial proteins as Parkinson’s disease potential biomarkers
Source: Springer Nature journal article supplement (doi:10.1186/s40035-020-00188-0), 2020-04-03
Supplement: MOESM4 [file 17864628]

**Supplementary Table 2 – Data of patients and control individuals used in the preliminary validation.** Individual sample codes (in italic) and demographic parameters are indicated for all the samples. For each group it is indicated an overall characterization of the group with the indication of the mean values, intervals, and gender distribution (indicated in bold).

|                                  | <b>Age (years)</b>    | <b>Gender</b>                |                                  |
|----------------------------------|-----------------------|------------------------------|----------------------------------|
| <b>Control Group</b>             | <i>Ctrl10</i>         | 53                           | M                                |
|                                  | <i>Ctrl31</i>         | 58                           | F                                |
|                                  | <i>Ctrl44</i>         | 60                           | M                                |
|                                  | <i>Ctrl66</i>         | 64                           | F                                |
|                                  | <i>Ctrl50</i>         | 67                           | F                                |
|                                  | <i>Ctrl12</i>         | 71                           | F                                |
|                                  | <i>Ctrl38</i>         | 71                           | F                                |
|                                  | <i>Ctrl54</i>         | 72                           | M                                |
|                                  | <i>Ctrl59</i>         | 72                           | F                                |
|                                  | <i>Ctrl18</i>         | 73                           | F                                |
|                                  | <i>Ctrl58</i>         | 74                           | F                                |
|                                  | <i>Ctrl39</i>         | 75                           | F                                |
|                                  | <b>Group overview</b> | <b>67.5±7.2<br/>[53, 75]</b> | <b>M: 3 (25%)<br/>F: 9 (75%)</b> |
| <b>Parkinson's Disease Group</b> | <i>PD3</i>            | 38                           | F                                |
|                                  | <i>PD51</i>           | 46                           | M                                |
|                                  | <i>PD64</i>           | 47                           | F                                |
|                                  | <i>PD16</i>           | 49                           | F                                |
|                                  | <i>PD21</i>           | 50                           | F                                |
|                                  | <i>PD8</i>            | 50                           | F                                |
|                                  | <i>PD20</i>           | 56                           | M                                |
|                                  | <i>PD27</i>           | 57                           | M                                |
|                                  | <i>PD19</i>           | 58                           | F                                |
|                                  | <i>PD25</i>           | 58                           | M                                |
|                                  | <i>PD46</i>           | 58                           | F                                |
|                                  | <i>PD70</i>           | 60                           | F                                |
|                                  | <i>PD37</i>           | 61                           | M                                |
|                                  | <i>PD4</i>            | 63                           | F                                |
|                                  | <i>PD26</i>           | 67                           | M                                |
|                                  | <i>PD57</i>           | 68                           | M                                |
|                                  | <i>PD13</i>           | 69                           | M                                |

|                       |                                     |                                             |
|-----------------------|-------------------------------------|---------------------------------------------|
| <i>PD29</i>           | 69                                  | M                                           |
| <i>PD42</i>           | 69                                  | F                                           |
| <i>PD34</i>           | 75                                  | F                                           |
| <i>PD15</i>           | 76                                  | F                                           |
| <i>PD45</i>           | 79                                  | F                                           |
| <b>Group overview</b> | <b>60.1±10.7</b><br><b>[38, 79]</b> | <b>M: 9 (40.9%)</b><br><b>F: 13 (59.1%)</b> |

<sup>a</sup>Age at blood coll. (y): age at blood collection in years; <sup>b</sup>The individuals were divided into males (M) and females (F).
